# Supplementary material for: Analysis of Circulating Tumor DNA in Synchronous Metastatic Colorectal Cancer at Diagnosis Predicts Overall Patient Survival
Source: MDPI journal article supplement (doi:10.3390/ijms24098438), 2023-05-08
Supplement: s1 [file s1]

**Supplementary Table S1.** Type of mutations detected in the *KRAS*, *NRAS*, *PIK3CA* and *BRAF* genes in paired primary tumor and plasma (liquid biopsy) samples from 51 patients with synchronous metastatic colorectal cancer (SMCC) at diagnosis.

| ID | <i>KRAS</i> |          | <i>PIK3CA</i> |        | <i>NRAS</i> |        | <i>BRAF</i> |        |
|----|-------------|----------|---------------|--------|-------------|--------|-------------|--------|
|    | PT          | Plasma   | PT            | Plasma | PT          | Plasma | PT          | Plasma |
| 1  | A59T/E/G    | A59T/E/G | WT            | E545X  | WT          | WT     | WT          | WT     |
| 2  | WT          | WT       | E542Q         | WT     | WT          | WT     | WT          | WT     |
| 3  | Q61H        | Q61H     | E545X         | WT     | WT          | WT     | WT          | WT     |
| 4  | G12V        | G12V     | H1047X        | H1047X | WT          | WT     | WT          | WT     |
| 5  | WT          | WT       | E545X         | WT     | WT          | WT     | WT          | WT     |
| 6  | WT          | WT       | E545X         | E545X  | WT          | G12D   | WT          | WT     |
| 7  | WT          | WT       | E545X         | E545X  | WT          | WT     | WT          | WT     |
| 8  | G12V        | WT       | R88Q          | WT     | WT          | WT     | WT          | WT     |
| 9  | WT          | K117N    | E545X         | WT     | WT          | WT     | WT          | WT     |
| 10 | WT          | WT       | WT            | E545X  | WT          | WT     | WT          | WT     |
| 11 | WT          | G12V     | H1047X        | E542K  | WT          | WT     | WT          | WT     |
| 12 | G12D        | G12D     | E545X         | E545X  | WT          | WT     | WT          | WT     |
| 13 | G12V        | G12V     | H1047X        | H1047X | WT          | WT     | WT          | V600E  |
| 14 | WT          | WT       | E545X         | WT     | WT          | WT     | WT          | WT     |
| 15 | WT          | WT       | WT            | WT     | WT          | WT     | WT          | WT     |
| 16 | WT          | WT       | WT            | WT     | WT          | WT     | WT          | WT     |
| 17 | WT          | WT       | WT            | WT     | WT          | WT     | WT          | WT     |
| 18 | WT          | WT       | WT            | WT     | WT          | WT     | WT          | WT     |
| 19 | G12V        | WT       | WT            | WT     | WT          | WT     | WT          | WT     |
| 20 | WT          | WT       | WT            | WT     | Q61R/K      | Q61R/K | WT          | WT     |
| 21 | G13D        | WT       | WT            | WT     | WT          | WT     | WT          | WT     |
| 22 | G12D        | G12D     | WT            | WT     | WT          | WT     | WT          | WT     |
| 23 | WT          | G12D     | WT            | WT     | WT          | WT     | WT          | WT     |
| 24 | WT          | WT       | WT            | WT     | WT          | WT     | WT          | WT     |
| 25 | WT          | WT       | WT            | WT     | WT          | WT     | WT          | WT     |
| 26 | G13D        | G13D     | WT            | WT     | WT          | WT     | WT          | WT     |
| 27 | WT          | WT       | WT            | WT     | WT          | WT     | V600E       | V600E  |
| 28 | WT          | WT       | WT            | WT     | WT          | WT     | WT          | WT     |
| 29 | WT          | WT       | WT            | WT     | WT          | WT     | WT          | WT     |

|    |           |           |    |    |    |      |    |    |
|----|-----------|-----------|----|----|----|------|----|----|
| 30 | Q61H      | WT        | WT | WT | WT | WT   | WT | WT |
| 31 | WT        | WT        | WT | WT | WT | WT   | WT | WT |
| 32 | A146P/T/V | A146P/T/V | WT | WT | WT | WT   | WT | WT |
| 33 | WT        | A59T/E/G  | WT | WT | WT | WT   | WT | WT |
| 34 | G12V      | G12V      | WT | WT | WT | WT   | WT | WT |
| 35 | G13D      | G13D      | WT | WT | WT | WT   | WT | WT |
| 36 | G13D      | G13D      | WT | WT | WT | Q61L | WT | WT |
| 37 | WT        | WT        | WT | WT | WT | WT   | WT | WT |
| 38 | G12V      | WT        | WT | WT | WT | WT   | WT | WT |
| 39 | G12A      | G12A      | WT | WT | WT | WT   | WT | WT |
| 40 | WT        | WT        | WT | WT | WT | WT   | WT | WT |
| 41 | G12V      | G12V      | WT | WT | WT | WT   | WT | WT |
| 42 | G12S      | G12S      | WT | WT | WT | WT   | WT | WT |
| 43 | WT        | WT        | WT | WT | WT | WT   | WT | WT |
| 44 | WT        | WT        | WT | WT | WT | WT   | WT | WT |
| 45 | G12D      | G12D      | WT | WT | WT | WT   | WT | WT |
| 46 | WT        | WT        | WT | WT | WT | WT   | WT | WT |
| 47 | WT        | WT        | WT | WT | WT | WT   | WT | WT |
| 48 | G13D      | G13D      | WT | WT | WT | WT   | WT | WT |
| 49 | G12A      | G12A      | WT | WT | WT | WT   | WT | WT |
| 50 | WT        | WT        | WT | WT | WT | WT   | WT | WT |
| 51 | G12C      | G12C      | WT | WT | WT | WT   | WT | WT |

PT: Primary tumor; WT: Wild Type
